# Supplementary material for: Exploring the Diversity of the Thioredoxin Systems in Cyanobacteria
Source: MDPI journal article supplement (doi:10.3390/antiox11040654), 2022-03-28
Supplement: s1 [file s1]

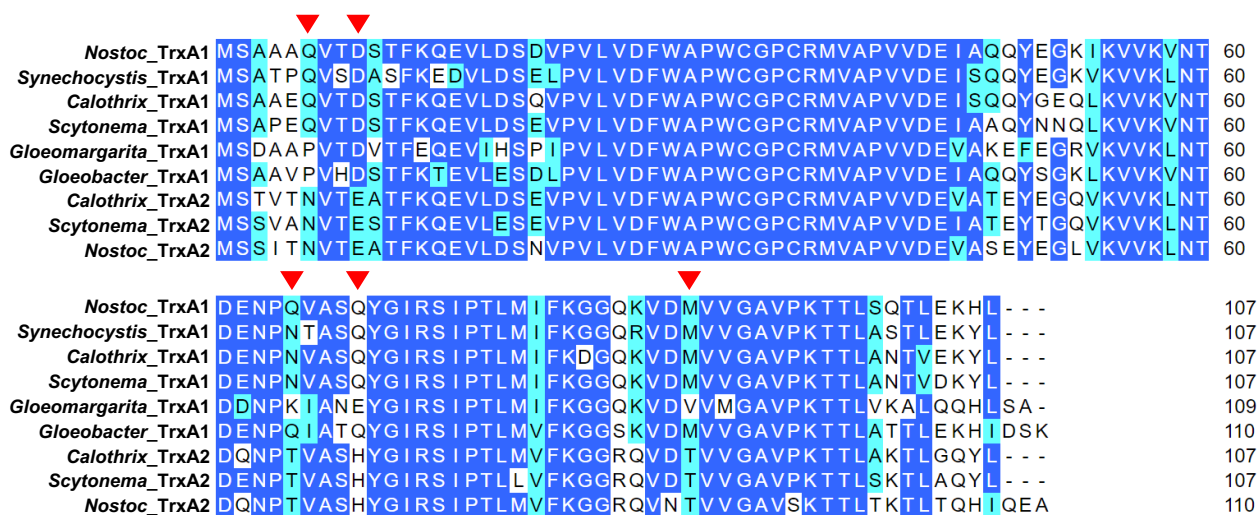

**Figure S1.** Multiple protein sequence alignment of several TrxA1 and TrxA2. The sequences are indicated with abbreviations of the organism names: *Nostoc* sp. PCC 7120 TrxA1 (Nostoc\_TrxA1), *Synechocystis* sp. PCC 6803 TrxA1 (Synechocystis\_TrxA1), *Calothrix* sp. 336/3 TrxA1 (Calothrix\_TrxA1), *Scytonema* sp. HK-05 TrxA1 (Scytonema\_TrxA1), *Gloeomargarita lithophora* TrxA1 (Gloeomargarita\_TrxA1), *Gloeobacter violaceus* TrxA1 (Gloeobacter\_TrxA1), *Calothrix* sp. 336/3 TrxA2 (Calothrix\_TrxA2), *Scytonema* sp. HK-05 TrxA2 (Scytonema\_TrxA2), and *Nostoc* sp. PCC 7120 TrxA2 (Nostoc\_TrxA2). The red triangles indicate the unique amino acids that are specific to TrxA2. Blue and cyan color indicate identity or similarity, respectively.

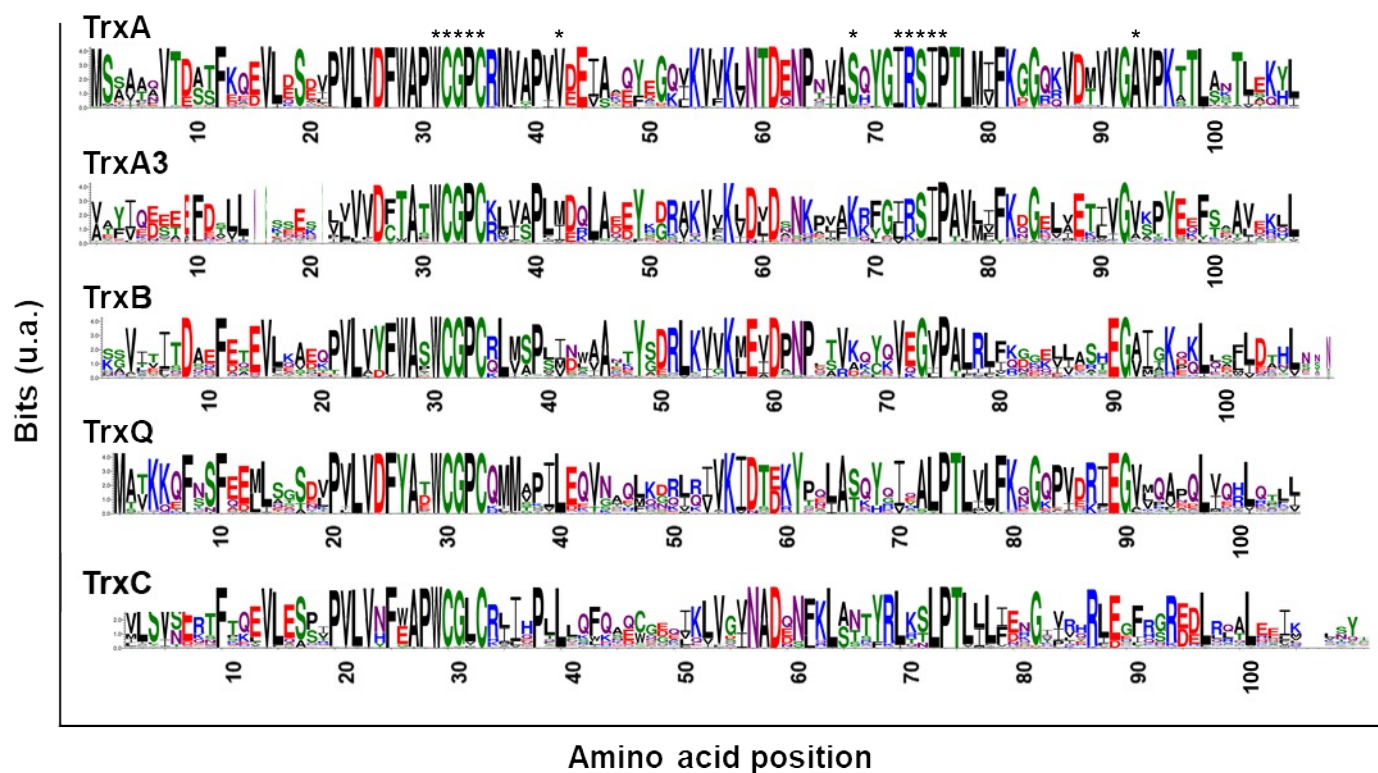

**Figure S2.** Sequence conservation of TrxA1/2, TrxA3, TrxB, TrxQ and TrxC. Logos were built using blast at IMG and NCBI databases, and manually curated in all cases. The sequences were aligned with Muscle algorithm and the alignment were generated with Weblogo3. The height of each amino acid code for each position indicate the frequency at that position. The numbering corresponds to the respective position in the Trxs of *Nostoc* sp. PCC 7120. Essential amino acids for the formation of the FTR-TrxA complex are marked with asterisks according to Dai et al., 2007.

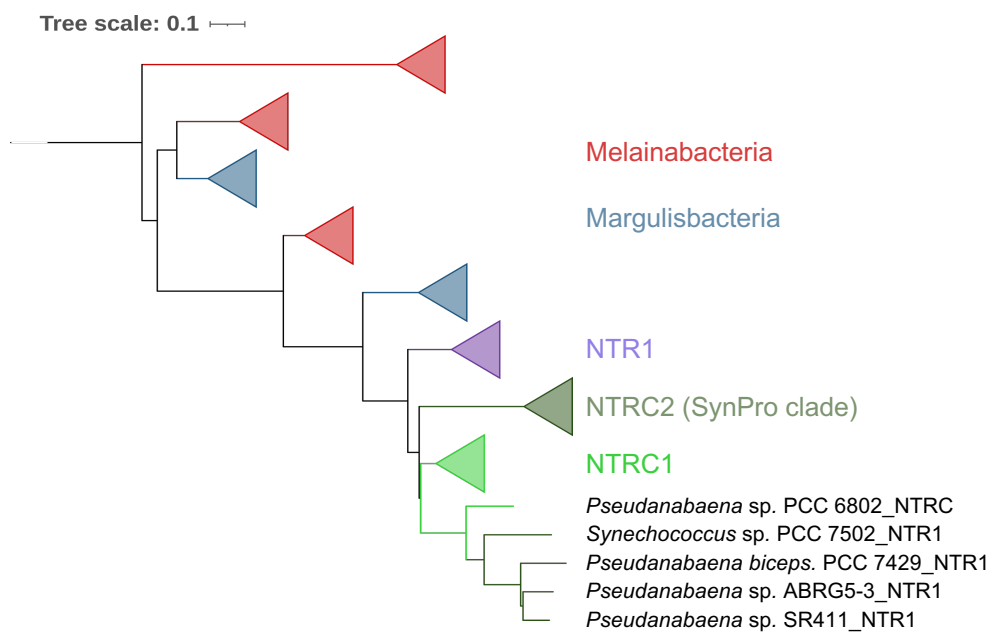

**Figure S3.** Phylogenetic tree related to NTRC and NTR1 present in Cyanobacteria and close relatives.

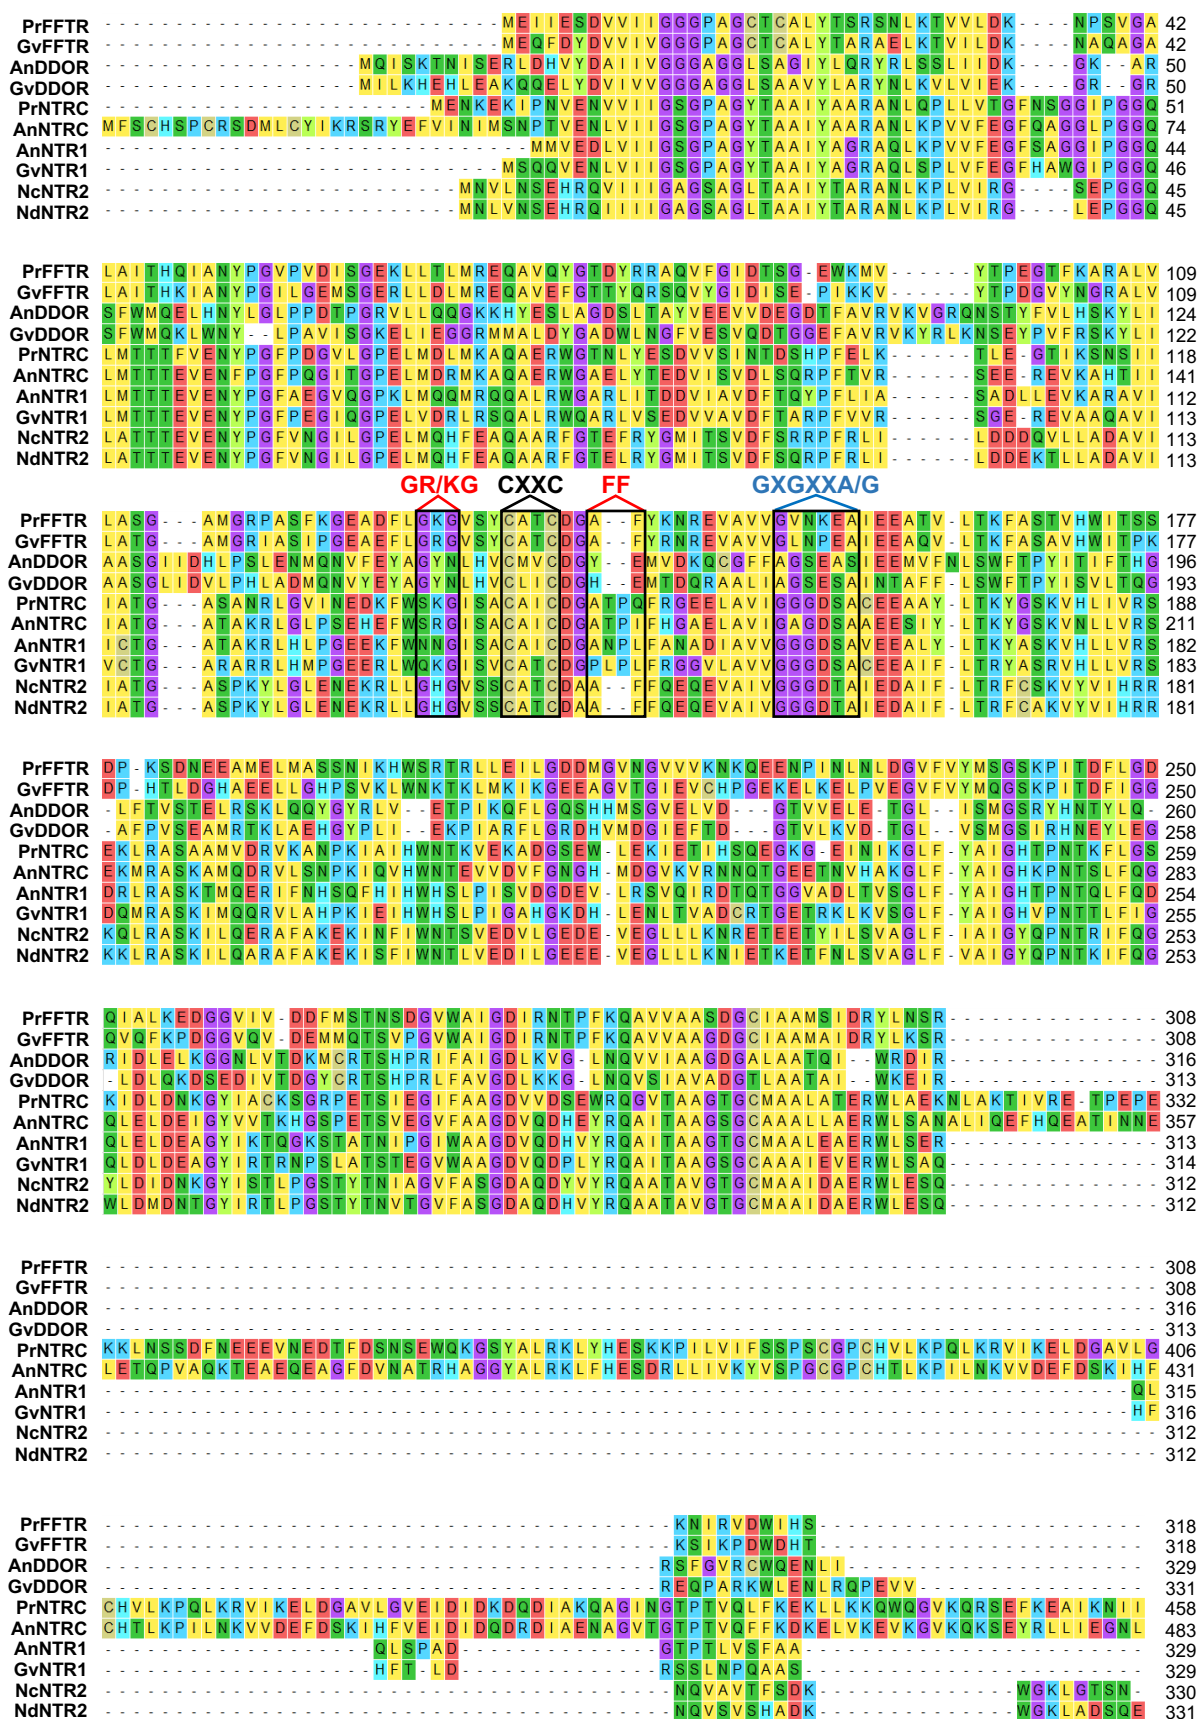

**Figure S4.** Multiple alignment of full protein sequence of several TR-related enzymes. The sequences are indicated with abbreviations of the organism names as in Figure 3B.

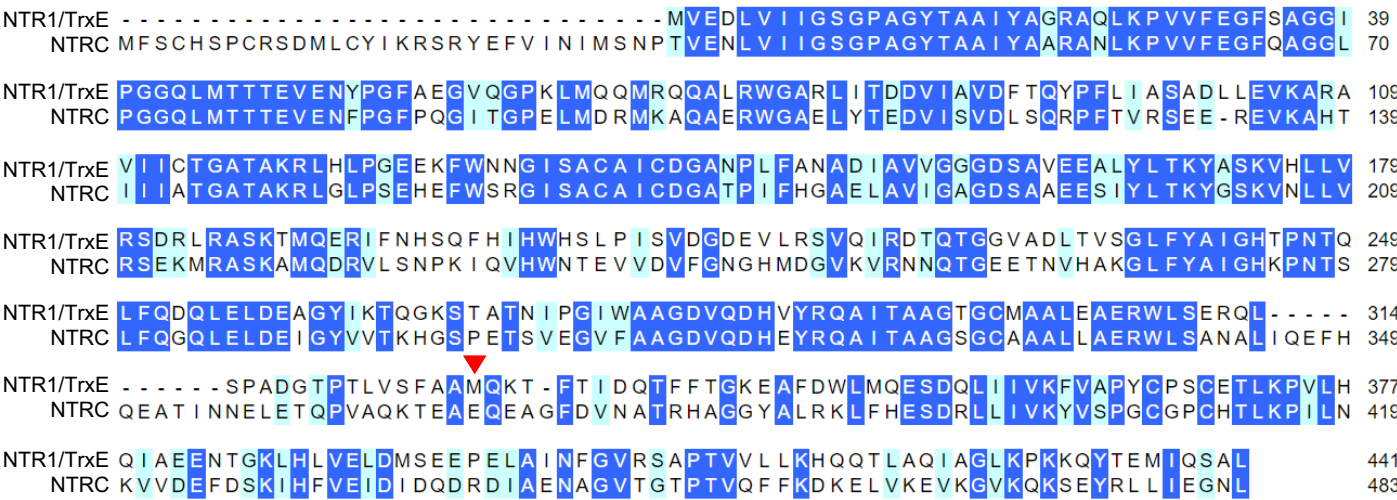

**Figure S5.** Alignment of the chimeric sequences NTR+TrxE and NTRC. The sequences used correspond to NTRC, NTR1 and TrxE of *Nostoc* sp. PCC 7120. The red triangle indicates the start of the TrxE fragment in the hypothetical chimeric protein. Blue and cyan color indicate identity and similarity, respectively.



|        |                     |              |          |                |                |                |                 |                 |       |    |         |       |          |       |           |         |          |           |      |          |        |          |     |   |   |   |   |   |   |   |   |   |   |   |   |   |   |   |   |   |   |   |   |   |   |   |   |   |     |     |   |   |   |   |   |   |   |   |     |     |     |     |   |   |   |     |     |     |     |     |     |     |     |
|--------|---------------------|--------------|----------|----------------|----------------|----------------|-----------------|-----------------|-------|----|---------|-------|----------|-------|-----------|---------|----------|-----------|------|----------|--------|----------|-----|---|---|---|---|---|---|---|---|---|---|---|---|---|---|---|---|---|---|---|---|---|---|---|---|---|-----|-----|---|---|---|---|---|---|---|---|-----|-----|-----|-----|---|---|---|-----|-----|-----|-----|-----|-----|-----|-----|
| ApNTRC | -----MA             | VENLV        | I        | IGSGPAGYTAAIYA | GRANLKP        | VVFEG          | MEAGGLPGGQ      | LMTT            | 49    |    |         |       |          |       |           |         |          |           |      |          |        |          |     |   |   |   |   |   |   |   |   |   |   |   |   |   |   |   |   |   |   |   |   |   |   |   |   |   |     |     |   |   |   |   |   |   |   |   |     |     |     |     |   |   |   |     |     |     |     |     |     |     |     |
| NcNTRC | --MLCYIKRSRYEFVINIM | SNPT         | VENLV    | I              | IGSGPAGYTAAIYA | AARANLKP       | VVFEGFQAGGLPGGQ | LMTT            | 68    |    |         |       |          |       |           |         |          |           |      |          |        |          |     |   |   |   |   |   |   |   |   |   |   |   |   |   |   |   |   |   |   |   |   |   |   |   |   |   |     |     |   |   |   |   |   |   |   |   |     |     |     |     |   |   |   |     |     |     |     |     |     |     |     |
| TeNTRC | -----MTPPRI         | EN           | V        | I              | IGSGPAGYTAAIYA | AARANLKP       | LMFEGYQIGGLPGGQ | LMTT            | 52    |    |         |       |          |       |           |         |          |           |      |          |        |          |     |   |   |   |   |   |   |   |   |   |   |   |   |   |   |   |   |   |   |   |   |   |   |   |   |   |     |     |   |   |   |   |   |   |   |   |     |     |     |     |   |   |   |     |     |     |     |     |     |     |     |
| OsNTRC | -----MSLNNTMTNPA    | V            | V        | I              | IGSGPAGFTAIIYA | GRANLKP        | VVFEGFQMG       | IGGQ            | 58    |    |         |       |          |       |           |         |          |           |      |          |        |          |     |   |   |   |   |   |   |   |   |   |   |   |   |   |   |   |   |   |   |   |   |   |   |   |   |   |     |     |   |   |   |   |   |   |   |   |     |     |     |     |   |   |   |     |     |     |     |     |     |     |     |
| SnNTRC | -----MTEQSR         | V            | V        | I              | IGSGPAGFTAIIYA | GRANLKP        | VVFEGFQVGGI     | IGGQ            | 53    |    |         |       |          |       |           |         |          |           |      |          |        |          |     |   |   |   |   |   |   |   |   |   |   |   |   |   |   |   |   |   |   |   |   |   |   |   |   |   |     |     |   |   |   |   |   |   |   |   |     |     |     |     |   |   |   |     |     |     |     |     |     |     |     |
| PrNTRC | -----MSI            | ENLV         | I        | IGSGPAGYTAAIYA | AARANLQ        | PLLITGFERGGI   | IGGQ            | LMTT            | 49    |    |         |       |          |       |           |         |          |           |      |          |        |          |     |   |   |   |   |   |   |   |   |   |   |   |   |   |   |   |   |   |   |   |   |   |   |   |   |   |     |     |   |   |   |   |   |   |   |   |     |     |     |     |   |   |   |     |     |     |     |     |     |     |     |
| AmNTRC | MQNGSKSQCSIR        | SRYLTVLMSEAI | ENLV     | V              | I              | IGSGPAGYTAAIYA | AARANLKP        | FMFAGYQAGGLPGGQ | LMTT  | 70 |         |       |          |       |           |         |          |           |      |          |        |          |     |   |   |   |   |   |   |   |   |   |   |   |   |   |   |   |   |   |   |   |   |   |   |   |   |   |     |     |   |   |   |   |   |   |   |   |     |     |     |     |   |   |   |     |     |     |     |     |     |     |     |
| ApNTRC | EVENFPGFPEG         | I            | QGPQLMDR | I              | RAQAERWGAD     | LIT            | EDVTV           | VDLSQRPF        | TIRSE | SH | EVQAHSI | I     | IATGATAK | 119   |           |         |          |           |      |          |        |          |     |   |   |   |   |   |   |   |   |   |   |   |   |   |   |   |   |   |   |   |   |   |   |   |   |   |     |     |   |   |   |   |   |   |   |   |     |     |     |     |   |   |   |     |     |     |     |     |     |     |     |
| NcNTRC | EVENFPGFP           | Q            | I        | TGPE           | LMDRMKAQA      | ERWGAEL        | Y               | TEDV            | I     | SV | DL      | SQRPF | TVRSE    | E     | EREVKAHTI | I       | IATGATAK | 138       |      |          |        |          |     |   |   |   |   |   |   |   |   |   |   |   |   |   |   |   |   |   |   |   |   |   |   |   |   |   |     |     |   |   |   |   |   |   |   |   |     |     |     |     |   |   |   |     |     |     |     |     |     |     |     |
| TeNTRC | EVENFPGFPEG         | I            | QGPQLM   | ARMKAQA        | ERWG           | T              | EMV             | TEDV            | I     | QV | D       | F     | SQRPF    | L     | I         | SSAERQV | Y        | AHSV      | I    | Q        | TGATAK | 122      |     |   |   |   |   |   |   |   |   |   |   |   |   |   |   |   |   |   |   |   |   |   |   |   |   |   |     |     |   |   |   |   |   |   |   |   |     |     |     |     |   |   |   |     |     |     |     |     |     |     |     |
| OsNTRC | EVENFPGFPEG         | I            | TGP      | K              | LMERMKLQA      | QRWGAEL        | Y               | TEDV            | Q     | S  | VD      | L     | SQRPF    | V     | I         | RS      | D        | EREVKAHTV | I    | IATGATAK | 128    |          |     |   |   |   |   |   |   |   |   |   |   |   |   |   |   |   |   |   |   |   |   |   |   |   |   |   |     |     |   |   |   |   |   |   |   |   |     |     |     |     |   |   |   |     |     |     |     |     |     |     |     |
| SnNTRC | EVENFPGFPEG         | I            | SGPQLM   | K              | MRQAQA         | RWGAEL         | Y               | P               | EDV   | T  | F       | VD    | L        | SQRPF | V         | V       | RS       | D         | EREV | THSL     | I      | IATGATAK | 123 |   |   |   |   |   |   |   |   |   |   |   |   |   |   |   |   |   |   |   |   |   |   |   |   |   |     |     |   |   |   |   |   |   |   |   |     |     |     |     |   |   |   |     |     |     |     |     |     |     |     |
| PrNTRC | FVENFPGFP           | D            | G        | I              | MGP            | D              | LMDLLKAQA       | I               | RWG   | T  | K       | L     | L        | E     | L         | D       | A        | E         | I    | D        | L      | K        | Q   | N | P | F | R | V | K | T | A | N | Q | S | I | A | A | Q | A | L | I | I | A | T | G | A | R | A | N   | 119 |   |   |   |   |   |   |   |   |     |     |     |     |   |   |   |     |     |     |     |     |     |     |     |
| AmNTRC | EVENFPGFP           | D            | G        | I              | TGP            | Q              | LMDRMKLQAL      | RWG             | S     | E  | I       | V     | T        | E     | D         | V       | I        | S         | V    | D        | F      | Q        | Q   | F | P | F | V | I | Q | S | E | E | R | T | V | K | A | H | S | V | I | A | T | G | A | T | A | K | 140 |     |   |   |   |   |   |   |   |   |     |     |     |     |   |   |   |     |     |     |     |     |     |     |     |
| ApNTRC | RLHLPGE             | E            | R        | F              | W              | T              | K               | G               | I     | S  | A       | C     | I        | D     | G         | A       | T        | P         | M    | F        | R      | N        | A   | E | L | A | V | V | G | G | D | S | A | V | E | E | A | I | Y | L | T | K | Y | G | S | K | V | H | L   | L   | R | S | E | K | M | R | A | S | K   | 189 |     |     |   |   |   |     |     |     |     |     |     |     |     |
| NcNTRC | RLGLPSE             | H            | E        | F              | W              | S              | R               | G               | I     | S  | A       | C     | I        | D     | G         | A       | T        | P         | I    | F        | H      | G        | A   | E | L | A | V | I | G | A | G | D | S | A | A | E | E | S | I | Y | L | T | K | Y | G | S | K | V | N   | L   | L | R | S | E | K | M | R | A | S   | K   | 208 |     |   |   |   |     |     |     |     |     |     |     |     |
| TeNTRC | RLHLPGE             | E            | Q        | Y              | W              | T              | K               | G               | V     | S  | A       | C     | I        | D     | G         | A       | T        | P         | I    | F        | K      | D        | V   | E | L | A | V | I | G | G | G | D | S | A | A | E | E | A | V | Y | L | T | K | Y | G | S | H | V | H   | L   | L | R | S | D | K | M | R | A | S   | K   | 192 |     |   |   |   |     |     |     |     |     |     |     |     |
| OsNTRC | RLGLPSE             | H            | Q        | F              | W              | S              | R               | G               | V     | S  | A       | C     | I        | D     | G         | A       | S        | P         | I    | F        | K      | G        | V   | S | L | A | V | V | G | G | D | T | A | A | E | E | A | V | Y | L | T | K | Y | G | S | H | V | H | L   | L   | R | S | E | E | M | R | A | S | K   | 198 |     |     |   |   |   |     |     |     |     |     |     |     |     |
| SnNTRC | RLHLPGE             | E            | I        | Y              | W              | N              | R               | G               | M     | S  | A       | C     | A        | V     | C         | D       | G        | A         | M    | P        | F      | R        | G   | V | E | L | V | I | G | G | D | T | A | C | E | E | A | T | Y | L | T | K | F | G | S | H | I | H | M   | L   | V | R | S | G | K | M | R | A | S   | K   | 193 |     |   |   |   |     |     |     |     |     |     |     |     |
| PrNTRC | KLGI                | P            | N        | E              | N              | K              | F               | W               | T     | R  | G       | I     | S        | A     | C         | I       | D        | G         | A    | T        | P      | Q        | F   | R | N | E | L | A | V | V | G | G | D | S | A | C | E | E | A | V | Y | L | T | K | Y | G | S | H | V   | H   | L | I | R | S | N | Q | L | K | A   | S   | K   | 189 |   |   |   |     |     |     |     |     |     |     |     |
| AmNTRC | RLGLPSE             | K            | E        | F              | W              | S              | R               | G               | I     | S  | A       | C     | I        | D     | G         | A       | T        | P         | I    | F        | K      | N        | E   | L | A | V | V | G | G | D | S | A | A | E | E | A | V | Y | L | T | K | Y | G | S | H | V | H | L | L   | R   | S | E | Q | M | R | A | S | K | 210 |     |     |     |   |   |   |     |     |     |     |     |     |     |     |
| ApNTRC | MQDR                | A            | L        | T              | A              | R              | V               | Q               | I     | H  | W       | N     | T        | I     | P         | L       | S        | V         | Y    | G        | D      | -        | E   | L | L | K | G | I | N | L | Q | N | T | Q | T | H | E | T | S | K | L | E | V | T | G | L | F | Y | A   | I   | G | H | S | P | N | T | Q | L | F   | Q   | G   | Q   | L | E | L | D   | 258 |     |     |     |     |     |     |
| NcNTRC | MQDR                | V            | L        | S              | N              | P              | K               | I               | Q     | V  | H       | W     | N        | T     | E         | V       | D        | V         | F    | G        | N      | -        | G   | H | M | D | G | V | K | V | R | N | N | Q | T | G | E | E | T | N | V | H | A | K | L | F | Y | A | I   | G   | H | K | P | N | T | S | L | F | Q   | G   | Q   | L   | E | L | D | 277 |     |     |     |     |     |     |     |
| TeNTRC | MQDR                | V            | F        | A              | N              | P              | K               | I               | T     | V  | H       | W     | Q        | T     | E         | A       | R        | E         | I    | L        | G      | D        | G   | N | L | M | T | G | L | R | I | I | N | K | A | T | G | E | E | S | L | P | V | R | G | L | F | Y | A   | I   | G | H | T | P | N | T | Q | L | F   | K   | D   | F   | L | E | L | D   | 262 |     |     |     |     |     |     |
| OsNTRC | MQDR                | V            | L        | K              | N              | P              | K               | I               | T     | V  | H       | W     | N        | T     | E         | A       | V        | D         | I    | F        | G      | D        | R   | M | E | G | I | K | V | R | N | I | K | T | G | E | E | T | D | L | Q | V | R | G | L | F | Y | A | I   | G   | H | T | P | N | T | Q | L | F | K   | G   | Q   | L   | E | L | D | 268 |     |     |     |     |     |     |     |
| SnNTRC | MQDR                | V            | L        | N              | H              | P              | K               | I               | T     | V  | H       | W     | N        | T     | E         | A       | V        | E         | V    | I        | F      | G        | D   | R | L | T | G | V | K | V | R | N | N | Q | T | G | E | I | R | E | M | A | V | G | L | F | Y | A | I   | G   | H | K | P | N | T | D | L | F | K   | G   | Q   | L   | E | L | D | 263 |     |     |     |     |     |     |     |
| PrNTRC | MSDR                | V            | M        | A              | N              | S              | Q               | I               | T     | V  | H       | W     | N        | T     | E         | L       | I        | D         | V    | E        | G      | K        | -   | E | W | I | E | T | L | K | V | K | R | R | G | T | K | Q | E | E | T | I | K | A | K | L | F | Y | A   | I   | G | H | T | P | N | A | D | L | E   | G   | Q   | L   | L | I | N | 258 |     |     |     |     |     |     |     |
| AmNTRC | MQDR                | V            | M        | R              | N              | P              | K               | V               | T     | V  | H       | W     | Q        | T     | E         | V       | D        | V         | F    | G        | D      | -        | T   | Q | L | Q | L | G | L | K | I | K | N | R | Q | T | A | E | I | Q | E | L | Q | V | R | G | L | F | Y   | A   | I | G | H | Q | P | N | T | Q | L   | F   | T   | Q   | Q | L | D | 279 |     |     |     |     |     |     |     |
| ApNTRC | DVGY                | I            | V        | T              | R              | S              | H               | S               | V     | A  | T       | N     | I        | E     | G         | V       | F        | A         | A    | G        | D      | V        | Q   | D | H | E | Y | R | Q | A | I | T | A | A | G | T | G | C | M | A | A | L | A | E | R | W | L | S | A   | Q   | G | L | I | E | E | Y | H | C | S   | V   | E   | A   | S | I | E | A   | 328 |     |     |     |     |     |     |
| NcNTRC | E                   | I            | G        | Y              | V              | V              | T               | K               | H     | G  | S       | P     | E        | T     | S         | V       | E        | G         | V    | F        | A      | A        | G   | D | V | Q | D | H | E | Y | R | Q | A | I | T | A | A | G | S | G | C | A | A | L | A | E | R | W | L   | S   | A | N | A | L | I | Q | E | F | H   | C   | E   | A   | T | I | N | N   | E   | L   | 347 |     |     |     |     |
| TeNTRC | SVGY                | I            | V        | T              | R              | H              | G               | T               | -     | Q  | T       | N     | V        | E     | G         | V       | F        | A         | A    | G        | D      | V        | Q   | D | H | E | Y | R | Q | A | V | T | A | A | G | S | G | C | M | A | A | L | D | A | E | R | W | L | S   | A   | R | G | L | I | Q | E | F | H | C   | -   | -   | -   | - | - | R | A   | T   | 326 |     |     |     |     |     |
| OsNTRC | EVGY                | I            | V        | T              | K              | H              | G               | T               | V     | E  | T       | S     | V        | E     | G         | V       | Y        | A         | A    | G        | D      | V        | Q   | D | H | E | F | R | Q | A | I | T | A | A | G | T | G | C | M | G | A | M | L | A | E | R | W | L | S   | V   | N | G | V | V | Q | E | F | H | C   | -   | -   | -   | - | - | T | E   | E   | S   | 334 |     |     |     |     |
| SnNTRC | EVGY                | I            | V        | T              | R              | P              | G               | S               | V     | A  | T       | S     | V        | E     | G         | V       | F        | A         | A    | G        | D      | V        | Q   | D | H | E | F | R | Q | A | I | T | A | A | G | T | G | C | M | A | A | L | A | E | R | W | L | S | E   | H   | G | L | A | Q | E | Y | H | V | P   | Q   | S   | H   | L | E | P | 333 |     |     |     |     |     |     |     |
| PrNTRC | QNGY                | I            | S        | T              | K              | S              | G               | R               | P     | E  | T       | S     | I        | E     | G         | V       | F        | A         | A    | G        | D      | V        | A   | D | A | E | W | R | Q | G | I | T | A | A | G | S | G | C | A | A | L | A | E | R | W | L | S | R | N   | N   | L | S | T | L | I | K | R | D | -   | -   | -   | S   | I | E | P | 325 |     |     |     |     |     |     |     |
| AmNTRC | KTGY                | I            | L        | T              | Q              | P              | D               | S               | V     | S  | T       | N     | I        | F     | G         | V       | F        | A         | A    | G        | D      | V        | Q   | E | H | E | F | R | Q | A | I | T | A | A | G | T | G | C | M | A | A | L | A | E | R | W | L | S | S   | Q   | D | L | I | N | E | F | H | C | -   | -   | -   | -   | S | E | A | S   | 345 |     |     |     |     |     |     |
| ApNTRC | SYL                 | P            | H        | G              | A              | E              | D               | L               | V     | V  | A       | P     | E        | -     | -         | -       | -        | -         | -    | -        | -      | -        | -   | - | - | - | - | E | E | P | F | N | L | S | E | T | Y | F | T | G | G | F | A | L | R | K | L | Y | H   | E   | S | D | K | L | I | V | K | Y | V   | A   | P   | G   | C | G | P | C   | H   | V   | L   | K   | P   | 388 |     |
| NcNTRC | E                   | T            | Q        | P              | V              | A              | Q               | K               | T     | E  | A       | E     | Q        | -     | -         | -       | -        | -         | -    | -        | -      | -        | -   | - | - | - | - | E | A | G | F | D | V | N | A | T | R | H | A | G | G | Y | A | L | R | K | L | F | H   | E   | S | D | R | L | I | V | K | Y | V   | S   | P   | G   | C | G | P | C   | H   | T   | L   | K   | P   | 405 |     |
| TeNTRC | E                   | T            | Q        | P              | A              | A              | T               | A               | K     | P  | T       | A     | S        | P     | -         | -       | -        | -         | -    | -        | -      | -        | -   | - | - | - | - | Q | Q | E | F | D | P | N | A | I | K | H | R | G | S | Y | A | L | R | K | L | F | H   | E   | S | D | R | L | L | V | K | Y | V   | S   | P   | T   | C | G | P | C   | H   | T   | L   | K   | P   | 385 |     |
| OsNTRC | E                   | K            | A        | P              | E              | P              | E               | K               | E     | Q  | K       | S     | D        | T     | -         | -       | -        | -         | -    | -        | -      | -        | -   | - | - | - | - | E | E | N | F | D | P | A | A | T | R | H | V | G | G | F | A | L | R | K | L | Y | H   | D   | S | D | R | L | I | V | K | Y | S   | A   | P   | T   | C | G | P | C   | H   | T   | L   | K   | P   | 393 |     |
| SnNTRC | A                   | S            | A        | S              | A              | V              | E               | V               | E     | P  | E       | G     | D        | S     | A         | V       | E        | E         | A    | S        | F      | E        | Q   | E | V | Q | D | D | L | D | F | S | Q | T | C | H | E | G | S | Y | A | L | R | L | Y | H | E | S | D   | R   | L | L | M | V | K | Y | T | A | P   | T   | C   | A   | P | C | H | A   | L   | K   | L   | 403 |     |     |     |
| PrNTRC | A                   | K            | T        | D              | K              | E              | T               | E               | I     | A  | I       | S     | T        | -     | -         | -       | -        | -         | -    | -        | -      | -        | -   | - | - | - | - | E | Q | N | F | D | A | T | K | T | W | Q | K | G | S | Y | A | L | R | K | L | Y | H   | E   | S | S | K | P | T | L | V | V | Y   | T   | S   | P   | N | C | G | P   | C   | H   | V   | L   | K   | P   | 383 |
| AmNTRC | E                   | Q            | T        | E              | D              | G              | T               | H               | P     | P  | E       | Y     | K        | L     | -         | -       | -        | -         | -    | -        | -      | -        | -   | - | - | - | - | S | A | A | F | D | P | N | T | R | H | Q | G | A | F | A | L | R | K | L | F | H | E   | S   | D | R | I | I | V | K | Y | A | S   | P   | T   | C   | G | P | C | H   | I   | L   | Q   | P   | 404 |     |     |
| ApNTRC | I                   | L            | K        | K              | A              | V              | D               | E               | F     | T  | G       | K     | M        | H     | L         | V       | E        | I         | D    | I        | A      | A        | E   | P | E | I | A | Q | A | G | V | R | G | T | P | T | L | Q | F | F | K | N | T | E | L | M | T | Q | T   | M   | G | M | K | Q | R | K | E | L | I   | G   | L   | I   | Q | K | F | L   | -   | -   | -   | 455 |     |     |     |
| NcNTRC | I                   | L            | N</      |                |                |                |                 |                 |       |    |         |       |          |       |           |         |          |           |      |          |        |          |     |   |   |   |   |   |   |   |   |   |   |   |   |   |   |   |   |   |   |   |   |   |   |   |   |   |     |     |   |   |   |   |   |   |   |   |     |     |     |     |   |   |   |     |     |     |     |     |     |     |     |

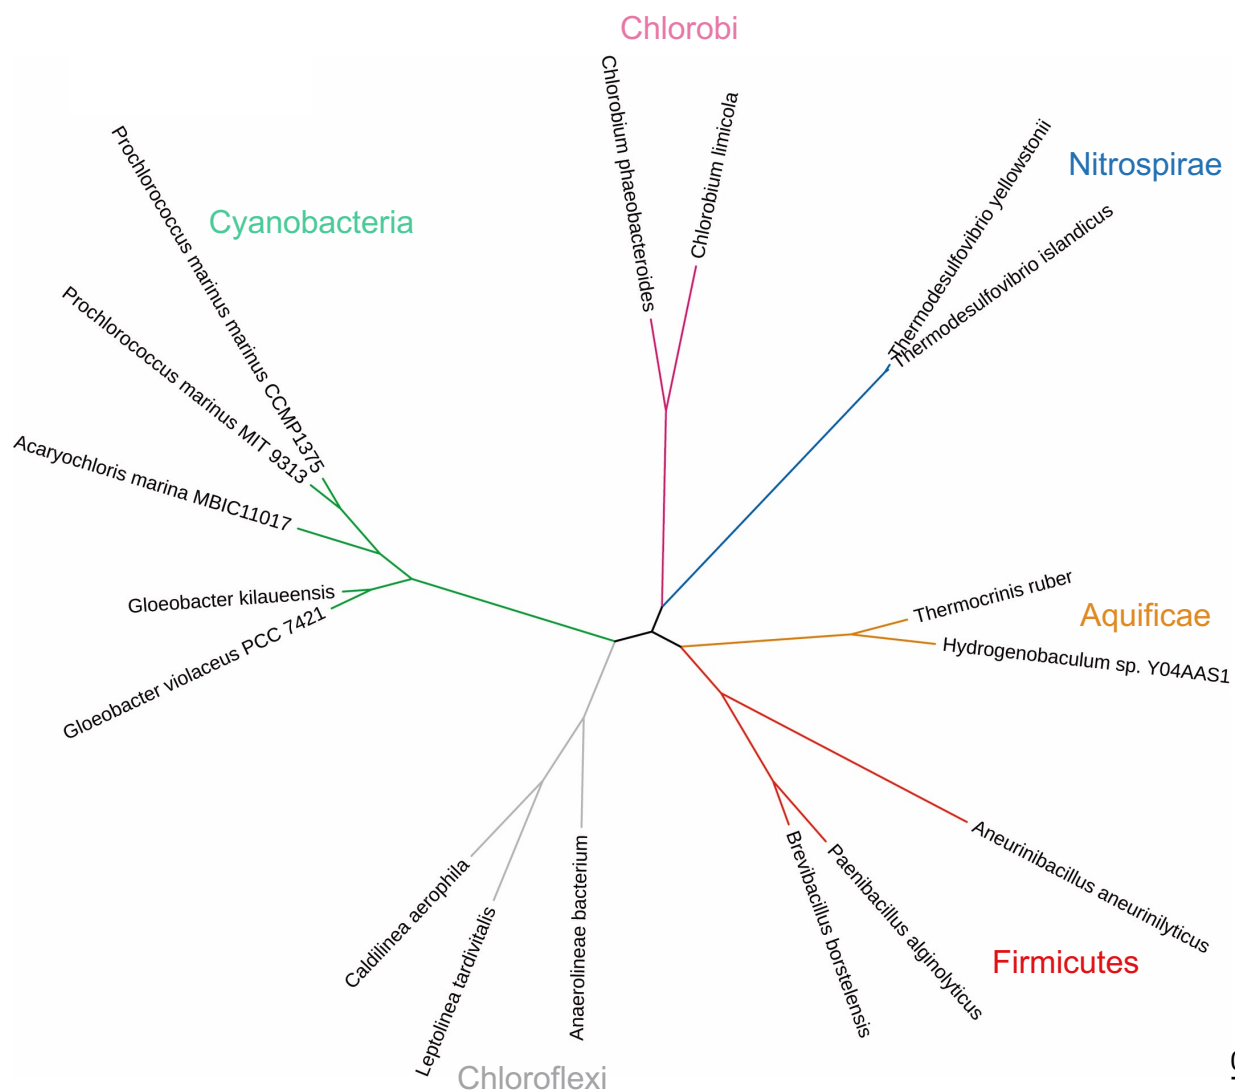

**Figure S7.** Unrooted tree of FFTR amino acid sequences identified in the IMG and NCBI databases. Branches are colored to represent FFTR amino acid sequences found in the different bacterial phyla: Cyanobacteria (green), Chlorobi (purple), Nitrospirae (blue), Aquificae (brown), Firmicutes (red), and Chloroflexi (grey). Scale bar represents number of substitutions per site.
